# Supplementary material for: Social sensing a volcanic eruption: application to Kīlauea 2018
Source: Copernicus journal article supplement (doi:10.5194/nhess-2024-3), 2024-01-10
Supplement: Supplementary file [file nhess-2024-3-RC1-supplement.pdf]

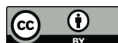

## Social sensing a volcanic eruption: application to Kīlauea 2018

2 James Hickey<sup>1</sup>, James Young<sup>2</sup>, Michelle Spruce<sup>2,3</sup>, Ravi Pandit<sup>4,5</sup>, Hywel Williams<sup>2</sup>, Rudy Arthur<sup>2</sup>,  
Wendy Stovall<sup>6</sup>, Matthew Head<sup>7</sup>

4 <sup>1</sup> Department of Earth and Environmental Sciences, University of Exeter, UK

<sup>2</sup> Department of Computer Science, University of Exeter, UK

6 <sup>3</sup> Liverpool Business School, Liverpool John Moores University, UK

<sup>4</sup> Institute for Data Science and Artificial Intelligence, University of Exeter, UK

8 <sup>5</sup> Centre for Life-Cycle Engineering and Management, Cranfield University, UK

<sup>6</sup> Volcano Hazards Program, United States Geological Survey, USA

10 <sup>7</sup> Department of Earth Science and Environmental Change, University of Illinois at Urbana-Champaign, Urbana, IL, USA

*Correspondence to:* James Hickey ([j.hickey@exeter.ac.uk](mailto:j.hickey@exeter.ac.uk))



14 **Abstract.** Protecting lives and livelihoods during volcanic eruptions is the key challenge in volcanology, conducted  
15 primarily by volcano monitoring and emergency management organizations, but complicated by scarce knowledge of how  
16 communities respond in times of crisis. Social sensing is a rapidly developing practice that can be adapted for volcanology.  
17 Here we use social sensing of Twitter posts to track changes in social action and reaction throughout the 2018 eruption of  
18 Kīlauea, Hawai'i. The volume of relevant tweets explodes in early May, coincident with the beginning of the eruption;  
19 automated sentiment analysis shows a simultaneous shift towards more negative emotions. Temporal trends in topics of local  
20 Twitter conversation reveal societal actions and reflect patterns in volcanic activity, civil protection actions and  
21 socioeconomic pressures. We show how hazard and risk information is discussed and reacted to on Twitter, which helps  
22 inform our understanding of community response actions and aids situational awareness.

## 1 Introduction

24 Volcanic crises can cause significant damage, casualties and economic loss (Brown et al., 2015; Barclay et al., 2015),  
25 especially as over 800 million people live **near volcanoes** (Loughlin et al., 2015) and many more depend on them for their  
26 livelihoods (Brown et al., 2015). During volcanic unrest and eruption volcano monitoring agencies work closely with  
27 emergency management organisations to assimilate multi-disciplinary data streams and provide hazard updates and  
28 actionable risk mitigation advice to communities at risk (Jolly and de la Cruz, 2015; Peltier et al., 2021; Bonaccorso et al.,  
29 2016; Stovall et al., 2023). Volcanic hazard and risk information are communicated to the public using a variety of media  
30 types (Stovall et al., 2023; Goldman et al., 2023; Williams and Krippner, 2019; Calabrò et al., 2020; Mani et al., 2024;  
31 Fearnley et al., 2018), but there is currently no large-scale mechanism to track how that information may result in individual-  
32 and community-level action (Mani et al., 2024), nor how that information may influence the **emotional state (reaction)** of  
33 affected populations. Consequently, social impacts of volcanic crises can be poorly understood. In particular, the actions and  
34 reactions of local populations may evolve *during* an eruptive crisis in response to the dynamic nature of volcanic hazards  
35 (Hicks and Few, 2015) and the fluctuating impacts of mitigation and recovery actions (Barclay et al., 2019). These time-  
36 dependent changes could provide useful feedback and information for volcanic monitoring agencies and emergency  
37 management organisations (Barclay et al., 2015) but are likely lost when traditionally interviewing subsets of affected  
38 individuals once a crisis has ended (Mani et al., 2024; Goldman et al., 2023; Christie et al., 2015; Naismith et al., 2020;  
39 Armijos et al., 2017).

40

41 Social media posts (text, photos and videos) are often shared in real-time with useful identifying keywords or 'hashtags', and  
42 can provide free, fast, efficient, quantifiable and valuable information during times of crisis (Guan and Chen, 2014; Yu et al.,  
43 2018; Wadsworth et al., 2022). Social sensing is the systematic analysis of publicly-available social media data to observe



44 real-world events (Liu et al., 2015). Emerging social sensing techniques have proven effective for studying a number of  
45 natural hazards (e.g., storms (Spruce et al., 2020), floods (Arthur et al., 2018; Young et al., 2022), hurricanes (Spence et al.,  
46 2015; Wu and Cui, 2018; Guan and Chen, 2014; Zhou et al., 2021), earthquakes (Steed et al., 2019), heatwaves (Kirilenko et  
47 al., 2015)), providing early warnings and information from **inaccessible locations**. Studies have been conducted to:  
48 geospatially detect and locate hazardous events, uncovering previously unknown hazard extents (Spruce et al., 2020; Arthur  
49 et al., 2018; Wu and Cui, 2018; Guan and Chen, 2014); investigate topics of discussion (Spruce et al., 2020; Spence et al.,  
50 2015; Guan and Chen, 2014) and emotional responses (Wu and Cui, 2018; Spruce et al., 2020; Giuffrida et al., 2020) that  
51 may vary through different temporal stages of a disaster; analyse societal impacts (Wu and Cui, 2018; Kryvasheyeu et al.,  
52 2016); assess how information spreads through social networks (Spence et al., 2015); and to conduct rapid damage  
53 assessment (Guan and Chen, 2014). Though analyses are sparse, there appears to be a **strong positive correlation between**  
54 **social media activity and damage losses** (Wu and Cui, 2018; Kryvasheyeu et al., 2016) **as well as a negative correlation**  
55 **between sentiment expressed in social media content and damage losses** (Wu and Cui, 2018). Social sensing has never been  
56 systematically applied to a volcanic eruption. Here we aim to test whether social sensing can track and quantify changes in  
57 societal actions and emotional responses during an eruptive crisis, and whether those changes are coincident with different  
58 stages of the eruption.

60 We focus our analyses on the 2018 Lower East Rift Zone (LERZ) eruption of Kīlauea volcano (Fig. 1), Hawai'i, due to its  
61 long duration (May – August 2018) and substantial socioeconomic impacts (Meredith et al., 2022; Houghton et al., 2021;  
62 Williams et al., 2020). The LERZ eruption was preceded in March and April 2018 by rapidly rising pressure in the Kīlauea  
63 magmatic system, evidenced by inflation around the Pu'u'ŏ'ŏ vent and rising levels in the Halema'uma'u lava lake (Neal et  
64 al., 2019; Anderson et al., 2019; Patrick et al., 2020). Eventually, the Pu'u'ŏ'ŏ crater collapsed on April 30<sup>th</sup> prompting  
65 magma to migrate eastwards downrift through dykes into the LERZ and causing elevated felt seismicity and surface  
66 deformation (including ground cracks) in the Puna district (Neal et al., 2019; Anderson et al., 2019). On May 1<sup>st</sup> the  
67 Hawaiian Volcano Observatory (HVO) issued a Volcanic Activity Notice (VAN) highlighting the possibility of a new  
68 eruption within the LERZ (Stovall et al., 2023). The eruption began on May 3<sup>rd</sup> (Fig. 1) with a fissure opening in the Leilani  
69 Estates subdivision, erupting basaltic lava flows. A total of 24 fissures opened during the eruption and were sequentially  
70 numbered, with fissure 8 being the most productive (Gansecki et al., 2019). Lava flows first reached the coast on May 19<sup>th</sup>,  
71 entering the sea and producing **laze**, while a later segment of the flow reached the sea on June 3<sup>rd</sup>. Major lava effusion ended  
72 on August 4<sup>th</sup>.

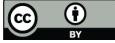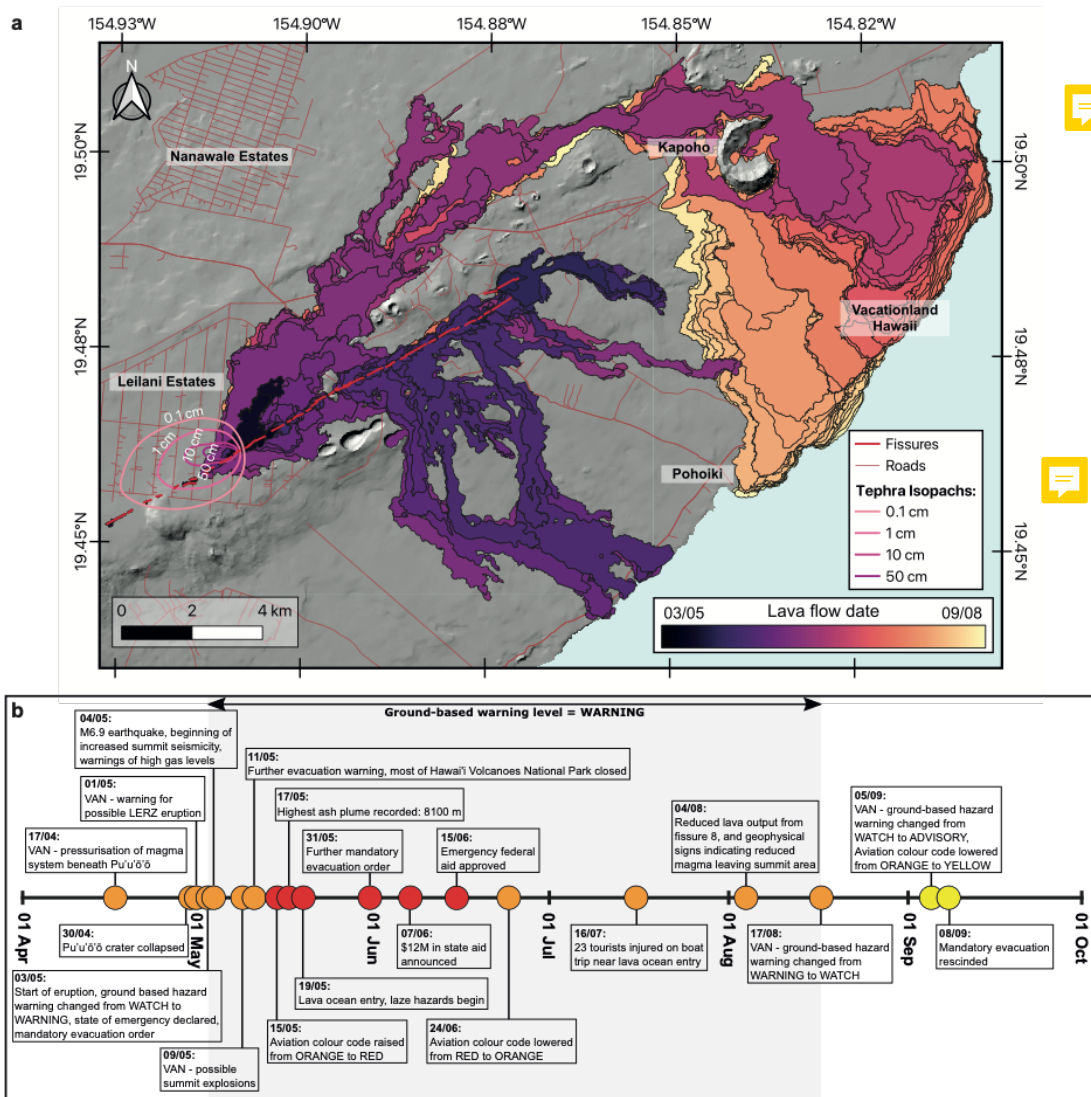

74 **Figure 1: Overview of the 2018 Kilauea LERZ eruption. (a) Map of the eruption with key locations highlighted alongside the**  
 76 **temporal evolution of the lava flow extent and the spatial distribution of tephra deposits from Fissure 8. (b) Timeline of the**  
 78 **eruption. The grey background indicates the period where the ground-based warning level was at ‘watch’ and the colour of the**  
 80 **points reflects the aviation warning colour code. VAN = volcanic activity notice.**

78 Simultaneous to the LERZ fissure activity, the summit reservoir feeding the LERZ eruption sequentially deflated, initially  
 80 producing summit explosions driven by rock fall into the lowering lava lake. As further deflation continued, the  
 Halema'uma'u crater widened, and larger ash-plume-producing collapse explosions progressed into a series of regular caldera  
 82 collapse events (Anderson et al., 2019). The successive caldera collapses were associated with felt ~M5 earthquakes,  
 significant additional lower magnitude seismicity, and production of ash plumes (Neal et al., 2019). The largest earthquake



84 related to the volcanic activity measured M6.9 on May 4<sup>th</sup>, believed to have been initiated by the dyke intrusion into the  
LERZ (Neal et al., 2019).

86

The lava flows covered 32.4 km<sup>2</sup> of the Puna district of Kīlauea’s LERZ (Fig. 1), destroying 1839 structures and damaging a  
88 further 90 (Meredith et al., 2022). Damage to buildings extended beyond the lava flow margins as a result of fire, thermal  
effects and the impact of volcanic gases and tephra (Meredith et al., 2022). Between May 2018 and April 2019 the estimated  
90 total economic cost of the eruption was ~\$1 billion, alongside the loss of 2950 jobs (County of Hawai‘i, 2020); the tourism  
and agriculture sectors were amongst the most severely impacted, and the closure of the Hawai‘i Volcanoes National Park is  
92 thought to have cost ~\$99 million alone (County of Hawai‘i, 2020). An estimated 5,563 people were permanently or  
temporarily displaced by the eruption, 2668 of whom were served mandatory evacuation orders (Kim et al., 2019). Amongst  
94 the impacted regions were differences in how eruption information was perceived regarding trust and credibility of the  
messenger(s) (Goldman et al., 2023). For example, in the LERZ where the impacts were felt most severely, surveyed  
96 residents reported placing more trust in “community messengers” whose information was mostly shared through social  
media (Goldman et al., 2023). Social media was also used extensively by the USGS HVO, **increasing two-way dialogue and**  
98 **the speed and reach of official communications**; it was deemed vital for the dynamic, rapidly-evolving situations for which  
they needed to provide updates (Stovall et al., 2023). The proliferation of social media usage during this eruption makes it an  
100 ideal case for exploring the application of social sensing in a novel volcanological context to detect and monitor social  
activity and emotional response.

## 102 2 Methods

We use Twitter data in this social sensing study. We note that Twitter has rebranded as “X”, but we will use the term Twitter  
104 (and tweets) in this publication, as that was its name in 2018. Twitter is an online micro-blogging social media service  
allowing users to post updates (called ‘tweets’) limited to 280 characters (including emoji). Tweets can be accompanied by  
106 multimedia content (e.g., photos or videos), and often contain ‘hashtags’ (indicated by a #) that link all tweets containing the  
same hashtag and allow users to follow specific topics. Twitter is one of the world’s most popular social networks, with over  
108 300 million users in 2018 rising to 415 million in 2023 (Degenhard, 2023), and is often used to share updates and  
information about events more rapidly than traditional media sources (Wu and Cui, 2018).

### 110 2.1 Twitter Data Collection

Our data collection centres around the 2018 LERZ eruption of Kīlauea. Twitter provides an application programming  
112 interface (API) that can be used to access and download Twitter data in real-time, or for historic events. At the time of data  
collection in May 2020, the free version of the API could not be used to access past (‘historic’) tweets, so a paid service was  
114 used to collect our data via the trackmyhashtag.com analytics tool. Later in 2020, the use of the academic API was extended



116 to allow free access to historic tweets. However, the free use of the academic API was discontinued in May 2023 following a  
change of Twitter ownership in October 2022, and is now administered within a premium paid business service beyond the  
scope of most academic research projects (Calma, 2023). Government and public-owned services have retained free access  
118 to the API for posting public utility alerts, and there is hope this will be extended to downloading tweet data, free usage of  
the API for monitoring severe events, and a possibly reduced rate for academic access.

120

Our data was collected using a “Kilauea” search term for all English language historic tweets, excluding retweets, between  
122 01-Jan-2018 and 01-Dec-2018 to cover the pre-eruption, eruption, and post-eruption period. Data were collected in  
JavaScript Object Notation (JSON) format for 163,438 tweets. The JSON file contains the tweet text, as well as a number of  
124 metadata fields (e.g., username, user location, geotag, tweet time and date, unique identifier). The following analyses and  
investigation are consistent with the Twitter terms of service. We acknowledge the possibility that some tweets posted  
126 around the time of the eruption might have been deleted prior to our data collection, and therefore we may be missing some  
potentially insightful data points.

## 128 2.2 Data Filtering

130 Following data collection, several steps were taken to first remove irrelevant data and then to narrow the focus of the data to  
a greater proportion of human insight. The following filters are described in the order in which they were applied.

- 132 • **Machine learning relevance filter.** A sample of 5,748 tweets were manually classified as relevant or irrelevant. To  
be classified as relevant the tweet needed to be related to the eruption of Kilauea. The labelled tweets were used as  
134 training data for a machine learning classifier; 70% were used for training and the remaining 30% were used for  
validation. A comparison of test data accuracy is shown in Table 1 for various machine learning models. The  
136 convolutional neural network yielded the highest accuracy on the test data and was consequently selected for use  
and applied to the full dataset. 89% of the full dataset (142,877 tweets) passed the relevance filter (Fig. A1).
- 138 • **Source removal.** Tweet metadata includes a source attribute that identifies whether the tweet originated from  
Twitter or an external source such as Facebook, Instagram, or a news website. Tweets from external sources are  
140 often automated and do not provide a human insight into the event, and therefore only tweets that were directly  
posted on Twitter were kept for this analysis.
- 142 • **Username removal.** A manual inspection of the dataset’s 100 most active tweeting accounts showed that many  
were news accounts or automated volcano tracking/update accounts. As these often do not provide human insight  
144 into the event it is common to remove them (Young et al., 2021). A list of words commonly found in unwanted  
Twitter account names was created and if any of these words were found in a tweet username, the tweet was  
146 removed. The list of words contained the following: 'news', 'daily', 'press', 'post', 'times', 'bbc', 'story', 'network',



'gazette', 'independent', 'stories', 'thesun', 'nation', 'media', 'guide', 'reuter', 'econom', 'radio', 'weather', 'climate',  
'trending', 'volcan', 'hawaii', 'lava', 'magma', 'mantle', 'kilauea', 'environ', 'nature', 'physic', 'science', 'quake'.

- **Duplicate removal.** Duplicate tweets were identified and removed from the dataset to ensure high data quality. The three main causes of duplication were: (i) duplicates arising during data collection; (ii) identical content shared across users, often copied and pasted from external sources; and (iii) user error or bots posting the same content multiple times.

The results of the filtering stages are shown in Fig. A1 where parallel trends in data volume are evident throughout 2018.

**Table 1: Test data accuracy for machine learning models applied for relevance classifier.**

| Model                        | Accuracy | F1 Score |
|------------------------------|----------|----------|
| Support Vector Machine       | 0.86     | 0.92     |
| Logistic Regression          | 0.86     | 0.92     |
| Multinomial Naïve Bayes      | 0.85     | 0.91     |
| Random Forest                | 0.86     | 0.92     |
| Convolutional Neural Network | 0.89     | 0.94     |

### 2.3 Location Inference

Location information is important for determining the spatial variation of eruption responses and can be obtained from Twitter users who enable geotagging or manually tag a location, providing either specific coordinates or a "bounding box" (a set area within which the location falls). Typically, however, only 2% of tweets include such location information in their metadata (Laylavi et al., 2016), which can greatly limit geospatial analysis. Location inference techniques can address this limitation and accurately locate tweets while maintaining a high volume of data. We applied the location inference method of Arthur et al. (2018) to our filtered relevant tweets. This approach uses multiple tweet indicators, including: locations in tweet text and user description; the user-entered location field; the manually tagged place attribute; and GPS coordinates of geotagged tweets. By overlaying the indicators present, the most probable location for the tweet is returned.

### 2.4 Sentiment Analysis

Sentiment analysis is a natural language processing technique that quantifies emotions in text. VADER (Valence Aware Dictionary and sEntiment Reasoner) is a commonly used sentiment analysis model, optimised for short-form social media data, making it suitable for our task. VADER works by assessing the sentiment of text based on a predefined



170 dictionary/lexicon of words, each manually assigned a sentiment score. These scores range from negative (-1) to positive  
172 (+1), reflecting the emotional tone of the words. The model considers not only individual words but also the context,  
including the use of intensifiers, negations, and punctuation. We applied VADER via the vaderSentiment Python package to  
the tweet text to calculate the overall sentiment score for each filtered relevant tweet.

## 174 2.5 Content Analysis

Filtered relevant tweets that had a geographic origin within Hawai'i were manually analysed and placed into one of five  
176 categories. The categories were determined after five independent human coders inspected subsamples of the full data set,  
and comprised:

- 178 • **Observation:** tweet contains, or links to, a description, photo or video of eruptive phenomena.
- **Warning:** tweet contains, or links to, official or unofficial warnings of the eruption.
- 180 • **Support and concern:** tweet contains, or links to, messages of support and/or concern for impacted individuals or  
communities.
- 182 • **Damage and disruption:** tweet contains, or links to, accounts of damage and/or disruption caused by the eruption.
- **Other:** tweets that are related to the eruption but do not fit into any of the previous categories.

184 The categorization of 4583 tweets was performed manually by the lead author. Prior to this, the five human coders  
performed inter-coder reliability checks to ensure the category descriptions and tweet assignments into categories were self-  
186 consistent across the five coders. Iterations between category descriptions and the number of categories improved the Fleiss  
Kappa agreement score from an initial 67% to 87%, which was deemed sufficient to progress with the final categorisation of  
188 tweets. Tweet text, and any included links or multimedia content were used to assign a category.

190 In addition to categorising the relevant Hawaiian tweets into one of the five categories, these tweets were also given a  
manual binary tag of being either related or unrelated to professional news. In this case, related to professional news meant a  
192 news agency or professional journalist posted the tweet, or the tweet contained a link to a professional online news article.

194 Finally, URLs within filtered relevant tweets were extracted from the tweet metadata. URLs in tweets are usually shortened  
to minimise their impact on the character limit. Many URLs were shortened using bit.ly, and the bitly API was used to  
196 expand them. For the remaining shortened URLs, a script using selenium was used to fully load the URLs, before scraping  
and returning the true domain.



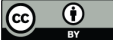

198 **3 Results**

**3.1 Event Timeseries**

200 Our initial dataset contains 163,438 tweets. The number of tweets per day explodes in early May, coincident with the onset  
 of unrest and beginning of the eruption, then slowly tails off with a return to near-background levels in late August (Fig. 2),  
 202 potentially due to a declining interest in the eruption and decreasing eruption impacts. From the full dataset, 89% of the data  
 (142,877 tweets) passed the relevance filter, and 68% of the relevant tweets (96,965 tweets) were able to be assigned to an  
 204 individual location; temporal trends in relevant and located tweets are parallel to that of the full dataset (Fig. 2, Fig. A1). The  
 relevant tweets are related to volcanic hazards and impacts of the eruption, as well as observations and civil protection  
 206 activities, while the irrelevant tweets contain a mixture of automated tweets, and tweets about the volcano and national park  
 but not the eruption (Fig. 2) An initial peak in tweet volume at the beginning of the eruption is followed by later peaks that  
 208 can be related to specific hazardous phenomena (e.g., the highest ash plume, the first lava ocean entry) or eruption impacts  
 (e.g., tourists getting injured on a boat trip).

210

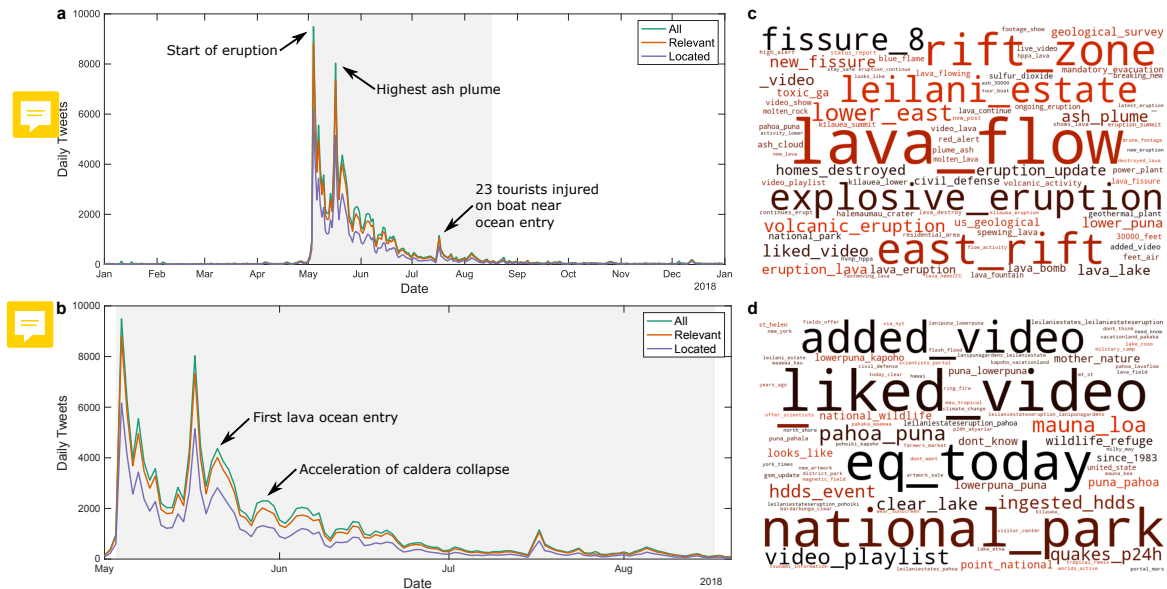

212 **Figure 2: Twitter data set timeseries and relevancy. (a) Timeseries of full Twitter data set (green), and the subsets that were**  
 214 **deemed relevant (orange) and able to be assigned to a location (blue), for all of 2018. (b) Same as a but for the eruption period**  
 216 **only. In a and b the grey background indicates the period where the ground-based warning level was at 'watch'. (c) Wordcloud of**  
**most common bigrams for all relevant tweets. (d) Wordcloud of most common bigrams for all irrelevant tweets. Larger bigrams in**  
**the wordclouds indicate a greater degree of occurrence.**

218 A high percentage of relevant tweets (89%) contrasts with many social sensing studies of other natural hazards, for example  
 ~1-44% for floods (Arthur et al., 2018; de Bruijn et al., 2019), 3-5% for UK storms (Spruce et al., 2020), 11% for worldwide



220 high-impact rainfall events (Spruce et al., 2021), and 19-27% for global heatwaves (Young et al., 2021). These findings may  
222 suggest that volcanic eruption discourse on Twitter is more unique when compared to general posts, and that further  
224 volcano-focussed social sensing studies could possibly benefit from such high relevancy by minimising the collection of  
226 irrelevant data. However, such a high percentage of relevant data may also be a result of a very specific initial data search  
228 term (“Kilauea”), and may not be repeated for volcano name search terms that have cross-over to other topics of  
230 conversation (e.g., Mount *Baker*, *Three Sisters*, *White Island*), or for impact-based initial search terms that are also used  
outside of volcanic eruptions (e.g., buried, covered, inundated). A similar finding has been reported for storm names, where  
the percentage of relevant tweets was much higher for a storm named ‘Ophelia’ (an uncommon name) compared to a storm  
named ‘Brian’ (a more common name). Within the relevant Kīlauea data, the clear peaks in data volume correlating with  
high-impact events highlight the strong public interest in such processes, justifying and enabling the use of social sensing to  
extract additional clues about social actions and reactions, for the eruption in question but also for future eruptions that have,  
or could have, significant socioeconomic impacts.

### 232 3.2 Sentiment Analysis

By examining only relevant filtered tweets, the automated sentiment analysis shows subtle temporal changes in expressed  
234 emotions through 2018 (Fig. 3). Sentiment scores range from negative (-1) to positive (+1) reflecting the emotional tone of  
the words. Prior to the eruption, the mean sentiment value is 0.19, matching an expected trend towards positive sentiment in  
236 general language (Dodds et al., 2015), but due to the very low data volume there is a low degree of confidence. During the  
eruption the mean sentiment score decreases to 0.00, indicating a greater degree of more negative emotions being expressed  
238 in the tweet text. After the eruption, the mean sentiment through to the end of 2018 increases to 0.08, but also with a low  
confidence from a low data volume. The equivalent values for Hawai'i-specific relevant tweets for the same time periods are:  
240 0.21, 0.02, and 0.05 (Fig. 3), indicating a similar magnitude decrease in sentiment during the eruption, but a smaller post-  
eruption recovery, potentially due to prolonged eruption impacts and post-event trauma. The temporal patterns between the  
242 Hawai'i-specific data and that of all geographic regions are similar. Within the eruption period there is an initial sharp  
decrease in sentiment reflecting the personal shock and upset caused by the early impacts, as well as increased media  
244 attention and circulation of news articles on Twitter. The next two most negative periods in the sentiment timeseries can be  
temporally correlated to noteworthy damage or impacts: the destruction of the residential area Vacationland and the injuries  
246 sustained by tourists on a boat trip (Fig. 3). There is generally no correlation between the more positive peaks in the  
sentiment timeseries' and the eruption.

248

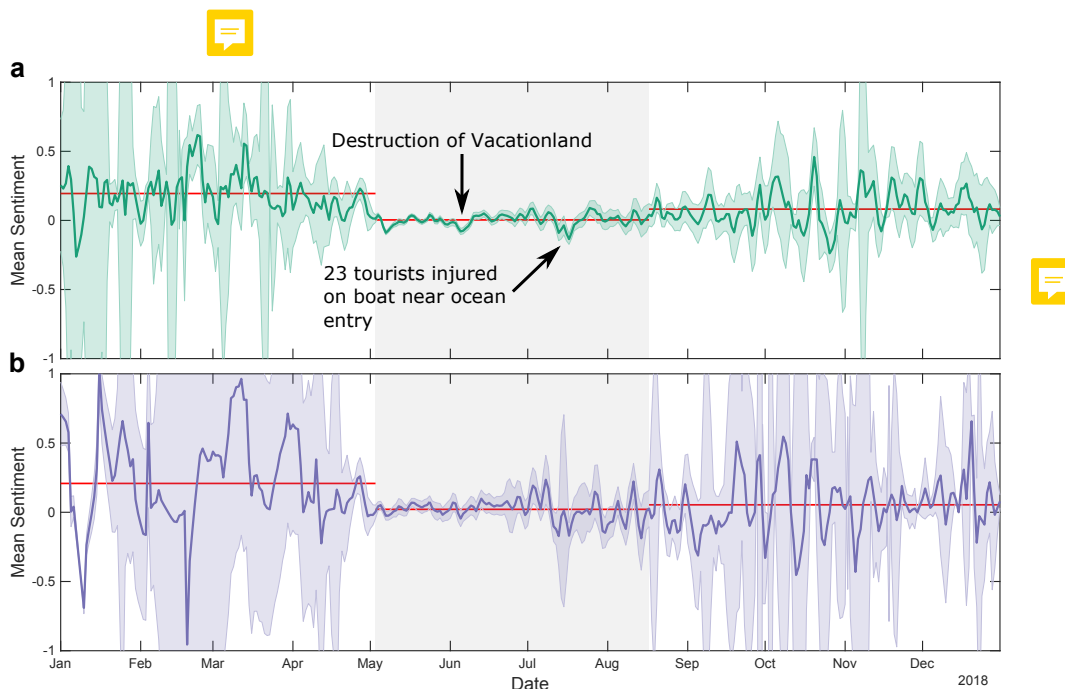

250 **Figure 3: Daily sentiment analysis timeseries. (a) Automated sentiment analysis values for all relevant filtered tweets. (b) Same as *a***  
252 **but only for tweets assigned to a location within Hawai'i. In *a* and *b* the grey background highlights the period where the ground-**  
254 **based warning level was at ‘watch’, and positive values reflect more positive emotions (and vice versa). The red lines mark the**  
**mean values for the pre-eruption, syn-eruption and post-eruption periods, and the shaded error bars are the 95% confidence**  
**intervals.**

256 Combining the outputs of tweet location inference and sentiment analysis allows us to investigate geospatial patterns in  
sentiment. When considering all geographic regions that can be assigned at least one geo-located tweet, there is no  
258 correlation between mean sentiment and distance from the eruption (Fig. 4). By filtering that same analysis to regions with at  
least 100 geo-located tweets, producing more reliable averages, reveals a weak negative correlation between mean sentiment  
260 and distance from the eruption (Fig. 4). Perhaps non-intuitively, tweets **originating from Hawai'i** are amongst the most  
positive, especially for regions with more than 30 geo-located tweets, driven largely by messages of hope and support (Fig.  
262 4c). Hawaiian tweets with negative sentiment detail localised detrimental impacts of the eruption. Through grouping of  
tweets originating outside Hawai'i, those with a negative sentiment reveal a trend towards more **dramatized and/or**  
264 **sensationalised accounts of the eruption** (perhaps a result of international media reporting (Calabrò et al., 2020)), while the  
positive sentiment tweets praise the apparent ‘beauty’ of the eruption, alongside a smaller proportion of messages of hope  
266 and support (Fig. 4).

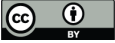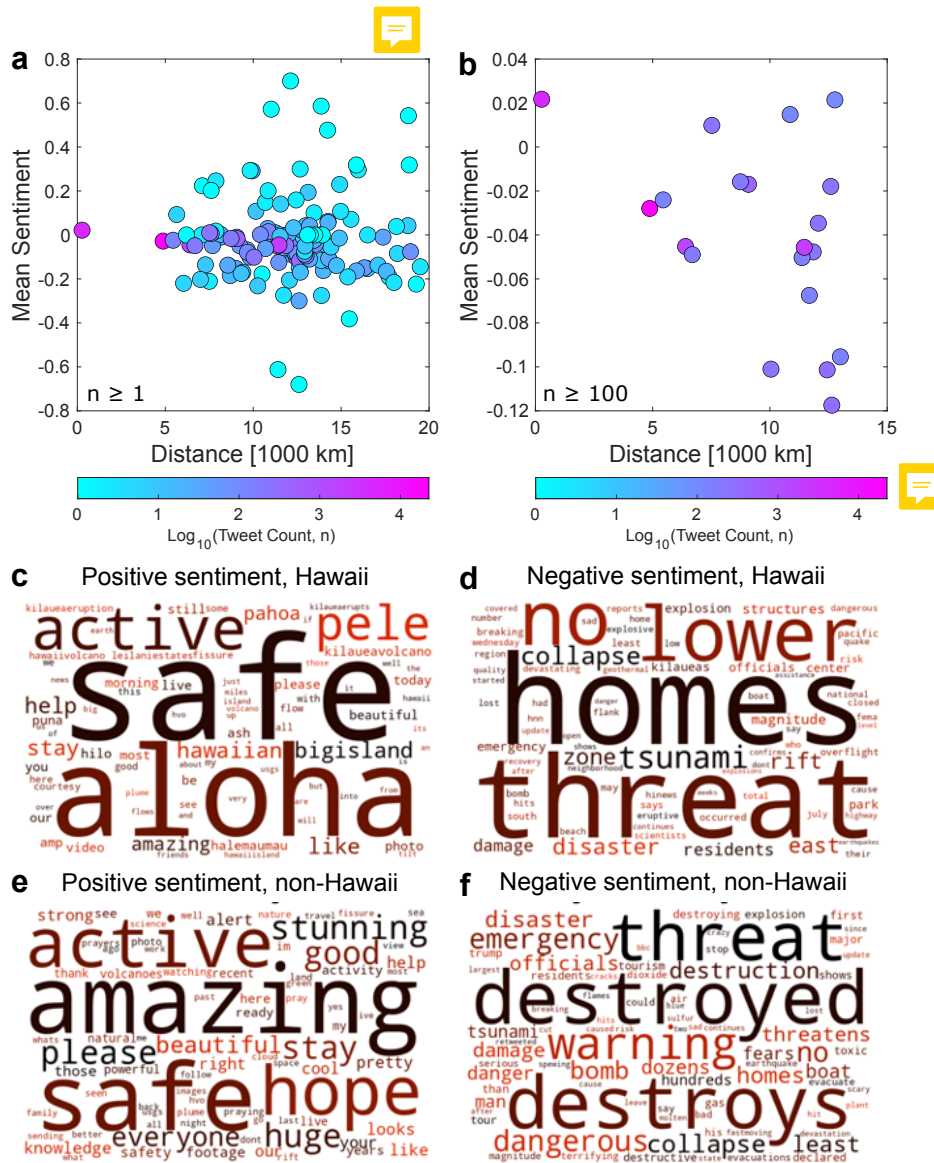

268

270

272

**Figure 4: Geospatial sentiment analysis. (a) Mean sentiment for all global regions with at least one tweet. (b) Same as a but with at least 100 tweets. (c-f) Bigram wordclouds for Hawai'i or non-Hawai'i from grouped positive or negative sentiment scored tweets. Larger bigrams in the wordclouds indicate a greater degree of occurrence.**

### 3.3 Content Analysis

274

Manual classification of relevant, filtered, Hawaiian tweets into one of five categories shows contrasting temporal patterns (Fig. 5). Warning-related tweets first increase prior to the eruption and coincident with the USGS VAN released on May 1<sup>st</sup>.

276

Later peaks in warning-related tweets correlate to a later USGS VAN warning about the potential for summit explosions and a change in the aviation colour code to red. These results indicate that a section of the public is not only noticing the official

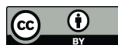

278 warnings, but also taking the time and effort to spread them within their social networks. Observation-based tweets  
expectedly show a peak at the beginning of the eruption, reflecting the initial intrigue of witnessing the event and sharing  
280 updates about areas impacted. A later, similar-sized peak in observation-based tweets records updates about the highest ash  
plume generated during the eruption, highlighting elevated levels of interest caused by the **paroxysm**. Tweets categorised as  
282 relating to messages of support and concern also peak at the beginning of the eruption, and during the explosion producing  
the highest ash plume with specific messages around mitigation actions and advice on dealing with the ash. A later peak of  
284 tweets expressing support in mid-June correlates to the FEMA (Federal Emergency Management Agency) approval of  
emergency disaster assistance, corresponding with the prospect of aid. Damage and disruption tweets show peaks in the early  
286 stages of the eruption related to the prolonged destruction of structures by the lava flows, as well as a single peak that can be  
correlated to the closure of the Hawai'i Volcanoes National Park. A minor peak in damage and disruption tweets occurs later  
288 coincident with a M5.6 earthquake and a **news article reporting on the destruction of homes**. Remaining tweets were  
categorised as “Other” and have a temporal trend that broadly mirrors observation-based tweets, which can be explained by a  
290 likely parallel pattern in eruption interest caused by the initiation and evolution of eruptive activity.

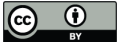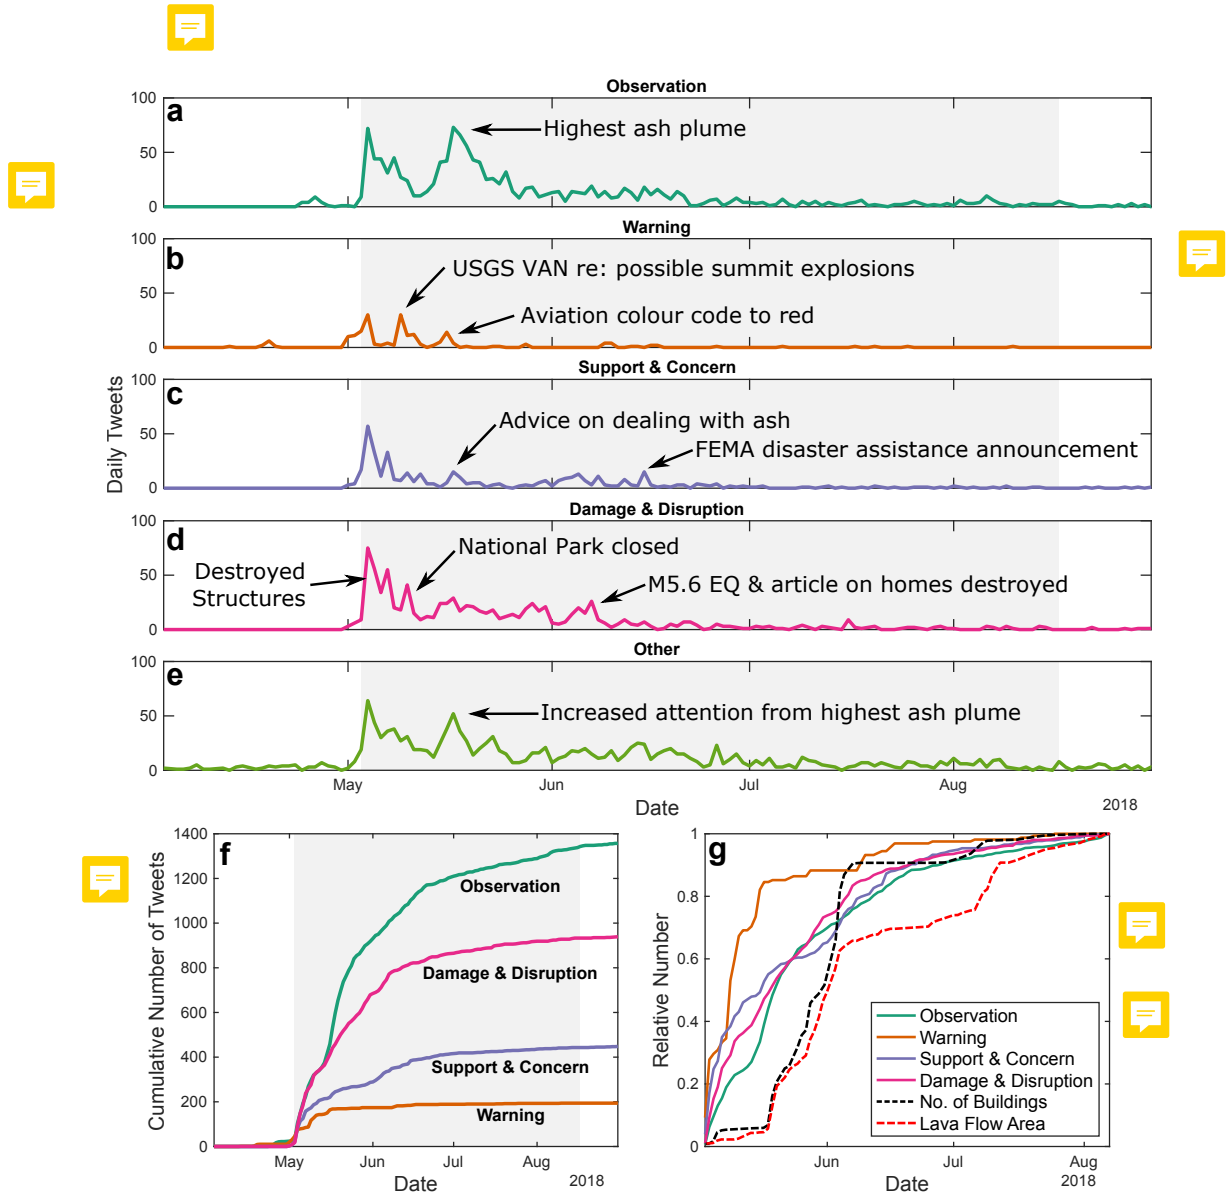

292

294

296

298

**Figure 5: Temporal content analysis for Hawaiian tweets. (a-e) Timeseries of daily tweet counts across 5 categories: observation, warning, support and concern, damage and disruption, and other. (f) Cumulative counts of tweet categories, using the same data as a-d. (g) Relative cumulative counts of tweet categories (observation, warning, support and concern, damage and disruption) compared against the relative number of buildings in contact with the lava and the area of lava flow inundation. All datasets are normalised to the same time-period. Lava flow and building damage data are from Meredith et al. (2022). In a-f the grey background highlights the period where the ground-based warning level was at ‘watch’.**

300

302

Contrasting temporal trends in the categorised tweets are also evident when examining their cumulative totals through time (Fig. 5f). Warning-based tweets roughly plateau in mid-May, while observation tweets increase throughout the eruption period albeit with a lower rate after mid-June. Comparing the cumulative pattern of damage and disruption tweets with an independent field-based damage assessment (Meredith et al., 2022) shows a correlation with the number of buildings in



304 contact with the lava; both begin to level-off in early June (Fig. 5g). Support and concern tweets also level-off in early-to-  
mid June, which is possibly all reflecting a change from channel-based lava emplacement to predominantly breakouts and  
306 overflows, which occurred after the second lava ocean entry on June 3<sup>rd</sup>, and drastically reduced the rate at which the lava  
flow was impacting built structures. Observation tweets more closely follow the temporal pattern of lava flow area (Fig. 5g),  
308 plateauing in early-August as the eruption ended. Favourable correlations between our social sensing data and independent  
field-based data provides an initial level of qualitative verification for our analyses.

310

Our content analysis of the relevant, Hawaiian tweets also highlighted a high proportion were related to professional news;  
312 either tweets from professional journalists or tweets containing links to news articles. The proportion of news-related tweets  
reached ~50% in the early stages of the eruption, before fluctuating back to ~20-30% by the end of the eruption (Fig. A2). In  
314 addition to sharing of news articles, the tweets also contained URLs (web addresses) for other online media (Table 2). For  
those Hawaiian tweets, YouTube was the top-shared web domain, followed by the USGS volcanoes webpage, and then  
316 mostly local news outlets. A complementary examination of relevant non-Hawaiian tweets also showed a high degree of  
URL sharing, with YouTube similarly the top-shared web domain, but then followed by primarily international news outlets.  
318 Together, these findings suggest that news agencies / journalists can strongly influence information shared on social media  
during an eruptive crisis.

320



322

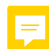

**Table 2: Shared URL counts from relevant tweets, grouped by geographic region and inclusion/exclusion of duplicate Tweets.**

|    | Location                          | Rank                  | Website URL's          | Count              | Location | Rank                      | Website URL's         | Count       |
|----|-----------------------------------|-----------------------|------------------------|--------------------|----------|---------------------------|-----------------------|-------------|
|    | <b>Including duplicate Tweets</b> | <b>Hawai'i tweets</b> | 1                      | youtube.com        | 366      | <b>Non-Hawai'i tweets</b> | 1                     | youtube.com |
| 2  |                                   |                       | volcanoes.usgs.gov     | 345                | 2        |                           | cnn.com               | 1077        |
| 3  |                                   |                       | staradvertiser.com     | 301                | 3        |                           | bbc.co.uk             | 732         |
| 4  |                                   |                       | facebook.com           | 279                | 4        |                           | apple.news            | 658         |
| 5  |                                   |                       | hawaiinewsnow.com      | 177                | 5        |                           | cbsnews.com           | 647         |
| 6  |                                   |                       | society6.com           | 82                 | 6        |                           | cnn.it                | 608         |
| 7  |                                   |                       | khon2.com              | 63                 | 7        |                           | facebook.com          | 608         |
| 8  |                                   |                       | bigislandvideonews.com | 55                 | 8        |                           | theguardian.com       | 484         |
| 9  |                                   |                       | cbsnews.com            | 38                 | 9        |                           | a.msn.com             | 471         |
| 10 |                                   |                       | instagram.com          | 35                 | 10       |                           | volcanoes.usgs.gov    | 455         |
|    | Location                          | Rank                  | Website                | Count              | Location | Rank                      | Website               | Count       |
|    | <b>Excluding duplicate Tweets</b> | <b>Hawai'i tweets</b> | 1                      | volcanoes.usgs.gov | 341      | <b>Non-Hawai'i tweets</b> | 1                     | youtube.com |
| 2  |                                   |                       | youtube.com            | 322                | 2        |                           | facebook.com          | 576         |
| 3  |                                   |                       | staradvertiser.com     | 277                | 3        |                           | cnn.com               | 497         |
| 4  |                                   |                       | facebook.com           | 274                | 4        |                           | volcanoes.usgs.gov    | 438         |
| 5  |                                   |                       | hawaiinewsnow.com      | 155                | 5        |                           | cbsnews.com           | 367         |
| 6  |                                   |                       | khon2.com              | 57                 | 6        |                           | volcanic-eruption.com | 285         |
| 7  |                                   |                       | bigislandvideonews.com | 49                 | 7        |                           | apple.news            | 271         |
| 8  |                                   |                       | society6.com           | 46                 | 8        |                           | express.co.uk         | 270         |
| 9  |                                   |                       | cbsnews.com            | 37                 | 9        |                           | hawaiinewsnow.com     | 230         |
| 10 |                                   |                       | instagram.com          | 34                 | 10       |                           | bbc.co.uk             | 230         |

324

#### 326 4 Discussion

328 Social sensing of tweets during the 2018 LERZ Kīlauea eruption has demonstrated temporal variation in social reaction (sentiment analysis) and action (content analysis) during the crisis, with syn-eruption changes in each that reflect patterns in





330 volcanic activity, civil protection actions and socioeconomic pressures. A decrease in mean tweet sentiment during the  
eruption, and especially in response to particular high-impact events, if taken as a proxy for mental health (Valdez et al.,  
2020; Aebi et al., 2021), implies the eruption had an adverse effect on the wellbeing of individuals. However, given the  
332 anonymised big data approach of the analysis there is no guarantee those individuals most affected, for example losing  
property or livelihoods, contributed to the data collection. Given the strong media influence, and prevalent sharing of URLs,  
334 it is also possible that some of the negative shift in the recorded sentiment was driven by news headlines (e.g., Fig. 4f).  
Regardless, within the uncertainty there is still a clear message highlighted by the Hawaiian tweets with a negative sentiment  
336 that detail localised eruption impacts and a harmful effect on societal mood.

338 From the perspective of hazard and risk communication, evidence of social action around sharing warnings in the lead up  
and early stages of the eruption, and sharing mitigation actions later during the eruption, is a positive outcome for volcano  
340 monitoring and emergency management organizations. Trust is a key issue in risk perception and hazard communication,  
and receiving crisis management advice shared by a friend, family member, or social network connection may lend more  
342 credibility to the information and increase its chances of uptake (Barclay et al., 2015; Christie et al., 2015; Goldman et al.,  
2023). It has already been shown, for example, that social media based “community messengers” were sharing very highly-  
344 trusted information during the 2018 LERZ eruption (Goldman et al., 2023). Our analyses lend further weight to this finding,  
and suggest that leveraging established social networks is likely a very productive route in future volcanic hazard and risk  
346 communication (Williams and Krippner, 2019), at Kīlauea and volcanoes worldwide.

348 Observation-based tweets, and tweets detailing damage and destruction, were greater in number than tweets about warnings  
or support and concern (Fig. 5). The former two categories link to suggestions of using crowd-sourced observations of  
350 volcanic eruptions for scientific use (Wadsworth et al., 2022), but the addition of a social sensing based approach would not  
require any participant to ‘opt-in’ and could be automated with programmed social media data scraping algorithms,  
352 potentially drastically increasing the volume of acquired data. However, care would also need to be taken to ensure only data  
with sufficient metadata for the intended task (e.g., time, location) was used.

354

In a forward-looking sense, automating the collection and selected analysis of social sensing data (from various social media  
356 platforms) real-time could provide crucial insight during times of crisis for volcano monitoring, disaster management, and  
civil protection decision makers. Real-time social sensing could be used, for example, to improve situational awareness at  
358 volcanoes worldwide where social media usage is prevalent, or to track the spread of misinformation (Williams and  
Krippner, 2019). The potentially very low collection of irrelevant data within online volcanic conversation (Fig. 2) may  
360 facilitate this approach. There are also opportunities to examine sentiment and content in finer detail if improved geolocation  
information can be made available or inferred, as well as to compare the insights provided by different languages and social  
362 media networks or messaging applications. Access to social media will also play a role, with volcanic eruptions in regions

with poor access likely to produce a smaller ‘signal’ than similar eruptions in areas with good access. It will be important to ensure that external coverage and conversation of eruptions does not bias our understanding of events, given their larger data volume compared to local data input and the demonstrated influence of international media outlets. In this regard, using social sensing in parallel with traditional structured interviews of affected individuals will allow further verification and quality control of the social sensing approach, and allow researchers and practitioners to benefit from the respective advantages of both methodologies.

## 5 Conclusions

Social sensing of Twitter posts can track changes in social action and reaction throughout the 2018 eruption of Kīlauea, Hawai‘i, through analyses of tweet frequency, sentiment, geolocation, and content. The volume of relevant tweets very rapidly increases in early May, corresponding to the beginning of the eruption; tweet frequency then generally declines to background levels over the course of the eruption with the exceptions of notable peaks in daily Tweet frequency in response to high-impact events. Automated sentiment analysis shows a shift towards more negative scores from the eruption onset, which indicates more negative emotions being expressed in the posts during the eruption. Time-dependent changes in topics of Hawai‘i-specific Twitter conversations reflect patterns in volcanic activity, civil protection actions, and socioeconomic pressures. We find evidence of social action around sharing official warnings in the eruption’s lead up and early stages and sharing official mitigation actions later during the eruption. Such evidence is a positive outcome for volcano monitoring and emergency management organizations that are responsible for the official messaging. Tweets detailing damage and disruption follow a similar temporal trend to the rate of lava flow field expansion and building damage. Our work generally shows how hazard and risk information is discussed and reacted to on Twitter, which informs our understanding of community response actions and the efficacy of warnings and other official risk reduction communications. Social sensing shows great promise for further development and application in volcanology; we show the potential for real-time social sensing analyses to aid in situational awareness for risk-reduction professionals during volcanic crises.

## Appendices

Appendix A

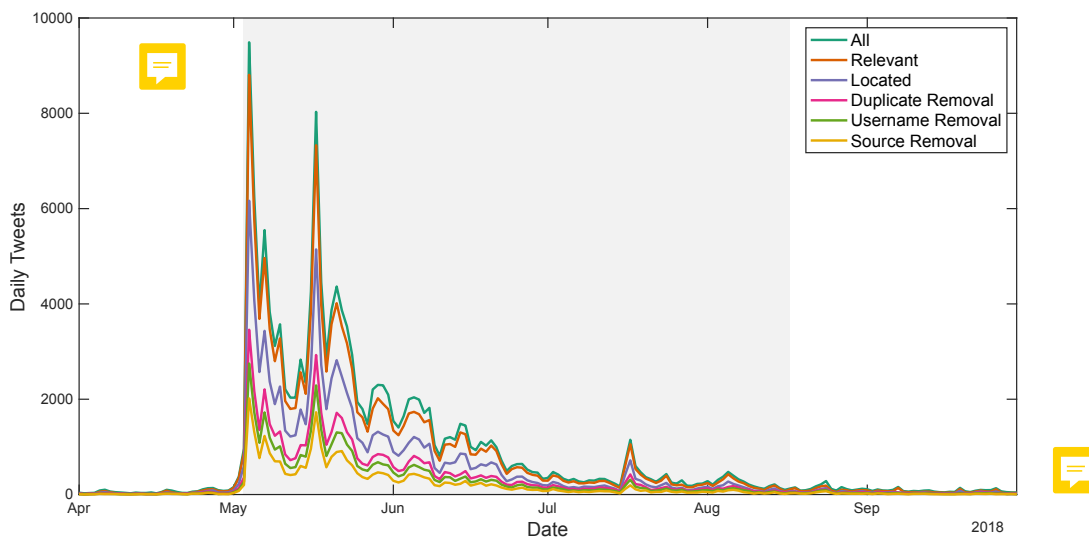

388

390

**Figure A1: Change in tweet data count at different stages of filtering. The grey background indicates the period where the ground-based warning level was at ‘watch’.**

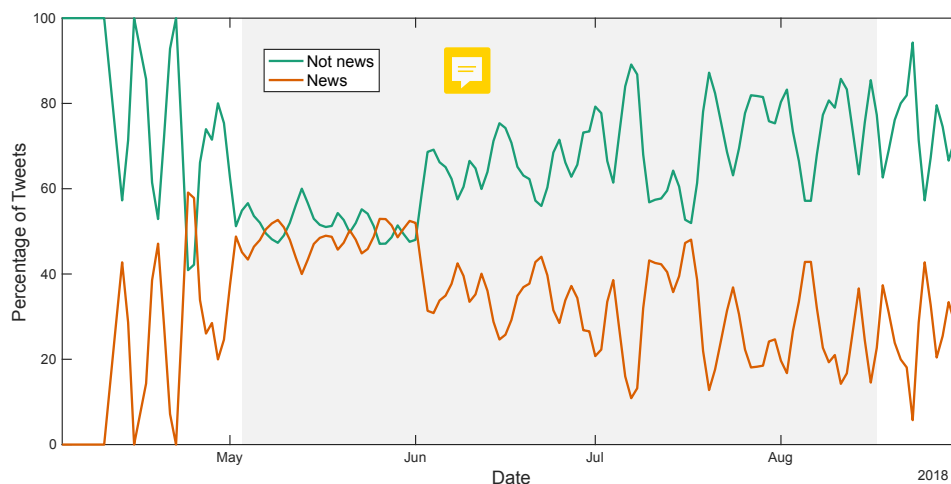

392

394

**Figure A2: Daily proportion of tweets classified as related to professional news outlets (orange), or not (green). The grey background indicates the period where the ground-based warning level was at ‘watch’.**

### Code Availability

396 The Python code for analysing the Twitter data is stored on a GitHub repository; access is private and can be obtained by contacting authors RA or HW.



#### 398 **Data Availability**

The tweet text data that support the findings of this study are available from Zenodo (DOI: [10.5281/zenodo.10473984](https://doi.org/10.5281/zenodo.10473984)) (Hickey, 2024).

#### **Author Contribution**

402 JH conceived the study and acquired the data. JY, MS and RP analysed the data, and contributed to its interpretation alongside JH, HW, RA, WS and MH. JH wrote the initial draft of the paper with input and revision from all other authors.

#### 404 **Competing Interests**

The authors declare that they have no conflict of interest.

#### 406 **Acknowledgements**

JH acknowledges funding from the University of Exeter Institute for Data Science and Artificial Intelligence, which supported RP. MS and JY were funded by UK Engineering and Physical Sciences Research Council PhD Studentships during this study. We thank Elinor Meredith for sharing damaged building and lava flow area data (Meredith et al., 2022). Any use of trade, firm, or product names is for descriptive purposes only and does not imply endorsement by the U.S. Government.

#### 412 **References**

- Aebi, N. J., De Ridder, D., Ochoa, C., Petrovic, D., Fadda, M., Elayan, S., Sykora, M., Puhan, M., Naslund, J. A., Mooney, S. J., and Gruebner, O.: Can Big Data Be Used to Monitor the Mental Health Consequences of COVID-19?, *Int. J. Public Health*, 66, 633451, <https://doi.org/10.3389/ijph.2021.633451>, 2021.
- 416 Anderson, K. R., Johanson, I. A., Patrick, M. R., Gu, M., Segall, P., Poland, M. P., Montgomery-Brown, E. K., and Miklius, A.: Magma reservoir failure and the onset of caldera collapse at Kīlauea Volcano in 2018, *Science* (80-. ), 366, <https://doi.org/10.1126/science.aaz1822>, 2019.
- 418 Armijos, M. T., Phillips, J., Wilkinson, E., Barclay, J., Hicks, A., Palacios, P., Mothes, P., and Stone, J.: Adapting to changes in volcanic behaviour: Formal and informal interactions for enhanced risk management at Tungurahua Volcano, Ecuador, *Glob. Environ. Chang.*, 45, 217–226, <https://doi.org/10.1016/j.gloenvcha.2017.06.002>, 2017.
- 422 Arthur, R., Boulton, C. A., Shotton, H., and Williams, H. T. P.: Social sensing of floods in the UK, *PLoS One*, 13, e0189327, <https://doi.org/10.1371/journal.pone.0189327>, 2018.



- 424 Barclay, J., Haynes, K., Houghton, B., and Johnston, D.: Social Processes and Volcanic Risk Reduction, Second Edi., Dr  
Jenni Barclay, Copyright © 2015, 1203–1214 pp., <https://doi.org/10.1016/b978-0-12-385938-9.00069-9>, 2015.
- 426 Barclay, J., Few, R., Armijos, M. T., Phillips, J. C., Pyle, D. M., Hicks, A., Brown, S. K., and Robertson, R. E. A.:  
Livelihoods, Wellbeing and the Risk to Life During Volcanic Eruptions, *Front. Earth Sci.*, 7, 1–15,  
428 <https://doi.org/10.3389/feart.2019.00205>, 2019.
- Bonaccorso, A., Calvari, S., and Boschi, E.: Hazard mitigation and crisis management during major flank eruptions at Etna  
430 volcano: Reporting on real experience, *Geol. Soc. Spec. Publ.*, 426, 447–461, <https://doi.org/10.1144/SP426.4>, 2016.
- Brown, S. K., Loughlin, S. C., Sparks, R. S. J., Vye-Brown, C., Barclay, J., Calder, E., Cottrell, E., Jolly, G., Komorowski,  
432 J.-C., Mandeville, C., Newhall, C. G., Palma, J. L., Potter, S., and Valentine, G.: Global volcanic hazard and risk, in: *Global  
Volcanic Hazards and Risk*, Cambridge University Press, 81–172, <https://doi.org/10.1017/CBO9781316276273.004>, 2015.
- 434 de Bruijn, J. A., de Moel, H., Jongman, B., de Ruiter, M. C., Wagemaker, J., and Aerts, J. C. J. H.: A global database of  
historic and real-time flood events based on social media, *Sci. Data*, 6, 1–12, <https://doi.org/10.1038/s41597-019-0326-9>,  
436 2019.
- Calabrò, L., Harris, A. J. L., and Thouret, J. C.: Media views of the Stromboli 2002-2003 eruption and evacuation: A content  
438 analysis to understand framing of risk communication during a volcanic crisis, *J. Appl. Volcanol.*, 9, 1–23,  
<https://doi.org/10.1186/s13617-020-00094-0>, 2020.
- 440 Twitter just closed the book on academic research: [https://www.theverge.com/2023/5/31/23739084/twitter-elon-musk-api-  
policy-chilling-academic-research](https://www.theverge.com/2023/5/31/23739084/twitter-elon-musk-api-policy-chilling-academic-research), last access: 18 August 2023.
- 442 Christie, R., Cooke, O., and Gottsmann, J.: Fearing the knock on the door: Critical security studies insights into limited  
cooperation with disaster management regimes, *J. Appl. Volcanol.*, 4, <https://doi.org/10.1186/s13617-015-0037-7>, 2015.
- 444 County of Hawai‘i: Kilauea Recovery and Resilience Plan, 2020.
- Number of Twitter users worldwide from 2018 to 2027: [https://www.statista.com/forecasts/1146722/twitter-users-in-the-  
446 world](https://www.statista.com/forecasts/1146722/twitter-users-in-the-world).
- Dodds, P. S., Clark, E. M., Desu, S., Frank, M. R., Reagan, A. J., Williams, J. R., Mitchell, L., Harris, K. D., Kloumann, I.  
448 M., Bagrow, J. P., Megerdooomian, K., McMahon, M. T., Tivnan, B. F., and Danforth, C. M.: Human language reveals a  
universal positivity bias, *Proc. Natl. Acad. Sci. U. S. A.*, 112, 2389–2394, <https://doi.org/10.1073/pnas.1411678112>, 2015.
- 450 Fearnley, C., Winson, A. E. G., Pallister, J., and Tilling, R.: Volcano Crisis Communication: Challenges and Solutions in the  
21st Century, in: *Observing the Volcano World: Volcano Crisis Communication*, edited by: Fearnley, C. J., Bird, D. K.,  
452 Haynes, K., McGuire, W. J., and Jolly, G., Springer International Publishing, Cham, 3–21,  
[https://doi.org/10.1007/11157\\_2017\\_28](https://doi.org/10.1007/11157_2017_28), 2018.
- 454 Gansecki, C., Lopaka Lee, R., Shea, T., Lundblad, S. P., Hon, K., and Parcheta, C.: The tangled tale of Kilauea’s 2018  
eruption as told by geochemical monitoring, *Science (80-. )*, 366, <https://doi.org/10.1126/science.aaz0147>, 2019.
- 456 Giuffrida, L., Lokys, H., and Klemm, O.: Assessing the effect of weather on human outdoor perception using Twitter, *Int. J.  
Biometeorol.*, 64, 205–216, <https://doi.org/10.1007/s00484-018-1574-7>, 2020.



- 458 Goldman, R., Stovall, W., Damby, D., and McBride, S.: Hawai'i residents' perceptions of Kīlauea's 2018 eruption information, *Volcanica*, 6, 19–43, <https://doi.org/10.30909/vol.06.01.1943>, 2023.
- 460 Guan, X. and Chen, C.: Using social media data to understand and assess disasters, *Nat. Hazards*, 74, 837–850, <https://doi.org/10.1007/s11069-014-1217-1>, 2014.
- 462 Hickey, J.: Tweet data for “Social sensing a volcanic eruption: application to Kīlauea 2018” (Version v1) [Data set], Zenodo, <https://doi.org/10.5281/zenodo.10473984>, 2024.
- 464 Hicks, A. and Few, R.: Trajectories of social vulnerability during the Soufrière Hills volcanic crisis, *J. Appl. Volcanol.*, 4, <https://doi.org/10.1186/s13617-015-0029-7>, 2015.
- 466 Houghton, B. F., Cockshell, W. A., Gregg, C. E., Walker, B. H., Kim, K., Tisdale, C. M., and Yamashita, E.: Land, lava, and disaster create a social dilemma after the 2018 eruption of Kīlauea volcano, *Nat. Commun.*, 12, 10–13, <https://doi.org/10.1038/s41467-021-21455-2>, 2021.
- 468 Jolly, G. and de la Cruz, S.: *Volcanic Crisis Management*, Second Edi., Elsevier Inc., 1187–1202 pp., <https://doi.org/10.1016/b978-0-12-385938-9.00068-7>, 2015.
- Kim, K., Pant, P., Yamashita, E., and Ghimire, J.: Analysis of Transportation Disruptions from Recent Flooding and  
472 Volcanic Disasters in Hawai'i, *Transp. Res. Rec.*, 2673, 194–208, <https://doi.org/10.1177/0361198118825460>, 2019.
- Kirilenko, A. P., Molodtsova, T., and Stepchenkova, S. O.: People as sensors: Mass media and local temperature influence  
474 climate change discussion on Twitter, *Glob. Environ. Chang.*, 30, 92–100, <https://doi.org/10.1016/j.gloenvcha.2014.11.003>,  
2015.
- 476 Kryvasheyev, Y., Chen, H., Obradovich, N., Moro, E., Van Hentenryck, P., Fowler, J., and Cebrian, M.: Rapid assessment of disaster damage using social media activity, *Sci. Adv.*, 2, 1–12, <https://doi.org/10.1126/sciadv.1500779>, 2016.
- 478 Laylavi, F., Rajabifard, A., and Kalantari, M.: A multi-element approach to location inference of Twitter: A case for emergency response, *ISPRS Int. J. Geo-Information*, 5, 1–16, <https://doi.org/10.3390/ijgi5050056>, 2016.
- 480 Liu, Y., Liu, X., Gao, S., Gong, L., Kang, C., Zhi, Y., Chi, G., and Shi, L.: Social Sensing: A New Approach to Understanding Our Socioeconomic Environments, *Ann. Assoc. Am. Geogr.*, 105, 512–530, <https://doi.org/10.1080/00045608.2015.1018773>, 2015.
- 482 Loughlin, S. C., Vye-Brown, C., Sparks, R. S. J., and Brown, S. K.: Global volcanic hazards and risk: Summary background paper for the Global Assessment Report on disaster risk reduction 2015, IAVCEI, 2015.
- Mani, L., Edwards, S., Joseph, E., Juman, A., and Thomas, T.: Evaluating the UWI-SRC crisis communications campaign  
486 during the 2020-2021 eruption of La Soufrière, St Vincent, *Geol. Soc. London, Spec. Publ.*, 539, <https://doi.org/10.1144/sp539-2022-297>, 2024.
- 488 Meredith, E. S., Jenkins, S. F., Hayes, J. L., Deligne, N. I., Lallemand, D., Patrick, M., and Neal, C.: Damage assessment for the 2018 lower East Rift Zone lava flows of Kīlauea volcano, Hawai'i, *Bull. Volcanol.*, 84, 1–23, <https://doi.org/10.1007/s00445-022-01568-2>, 2022.
- 490 Naismith, A. K., Armijos, M. T., Escobar, E. A. B., Chigna, W., and Watson, I. M.: Fireside tales: Understanding



- 492 experiences of previous eruptions among other factors that influence the decision to evacuate from eruptive activity of  
Volcán de Fuego, *Volcanica*, 3, 206–226, <https://doi.org/10.30909/vol.03.02.205226>, 2020.
- 494 Neal, C. A., Brantley, S. R., Antolik, L., Babb, J. L., Burgess, M., Calles, K., Cappos, M., Chang, J. C., Conway, S.,  
Desmither, L., Dotray, P., Elias, T., Fukunaga, P., Fuke, S., Johanson, I. A., Kamibayashi, K., Kauahikaua, J., Lee, R. L.,  
496 Pekalib, S., Miklius, A., Million, W., Moniz, C. J., Nadeau, P. A., Okubo, P., Parcheta, C., Patrick, M. R., Shiro, B.,  
Swanson, D. A., Tollett, W., Trusdell, F., Younger, E. F., Zoeller, M. H., Montgomery-Brown, E. K., Anderson, K. R.,  
498 Poland, M. P., Ball, J. L., Bard, J., Coombs, M., Dietterich, H. R., Kern, C., Thelen, W. A., Cervelli, P. F., Orr, T.,  
Houghton, B. F., Gansecki, C., Hazlett, R., Lundgren, P., Diefenbach, A. K., Lerner, A. H., Waite, G., Kelly, P., Clor, L.,  
500 Werner, C., Mulliken, K., Fisher, G., and Damby, D.: The 2018 rift eruption and summit collapse of Kīlauea Volcano,  
*Science* (80-. ), 363, 367–374, <https://doi.org/10.1126/science.aav7046>, 2019.
- 502 Patrick, M. R., Houghton, B. F., Anderson, K. R., Poland, M. P., Montgomery-Brown, E., Johanson, I., Thelen, W., and  
Elias, T.: The cascading origin of the 2018 Kīlauea eruption and implications for future forecasting, *Nat. Commun.*, 11, 1–  
504 13, <https://doi.org/10.1038/s41467-020-19190-1>, 2020.
- Peltier, A., Ferrazzini, V., Muro, A. Di, Kowalski, P., Villeneuve, N., Richter, N., Chevrel, O., Froger, J. L., Hrysiewicz, A.,  
506 Gouhier, M., Coppola, D., Retailleau, L., Beauducel, F., Gurioli, L., Boissier, P., Brunet, C., Catherine, P., Fontaine, F.,  
Lauret, F., Garavaglia, L., Lebreton, J., Canjamale, K., Desfete, N., Griot, C., Harris, A., Arellano, S., Liuzzo, M., Gurrieri,  
508 S., and Ramsey, M.: Volcano crisis management at piton de la fournaise (la réunion) during the covid-19 lockdown, *Seismol.*  
*Res. Lett.*, 92, 38–52, <https://doi.org/10.1785/0220200212>, 2021.
- 510 Spence, P. R., Lachlan, K. A., Lin, X., and del Greco, M.: Variability in Twitter Content Across the Stages of a Natural  
Disaster: Implications for Crisis Communication, *Commun. Q.*, 63, 171–186,  
512 <https://doi.org/10.1080/01463373.2015.1012219>, 2015.
- Spruce, M., Arthur, R., and Williams, H. T. P.: Using social media to measure impacts of named storm events in the United  
514 Kingdom and Ireland, *Meteorol. Appl.*, 27, 1–17, <https://doi.org/10.1002/met.1887>, 2020.
- Spruce, M. D., Arthur, R., Robbins, J., and Williams, H. T. P.: Social sensing of high-impact rainfall events worldwide: A  
516 benchmark comparison against manually curated impact observations, *Nat. Hazards Earth Syst. Sci.*, 21, 2407–2425,  
<https://doi.org/10.5194/nhess-21-2407-2021>, 2021.
- 518 Steed, R. J., Fuenzalida, A., Bossu, R., Bondár, I., Heinloo, A., Dupont, A., Saul, J., and Strollo, A.: Crowdsourcing triggers  
rapid, reliable earthquake locations, *Sci. Adv.*, 5, 1–7, [https://doi.org/10.1126/sciadv.aau9824\\_rfseq1](https://doi.org/10.1126/sciadv.aau9824_rfseq1), 2019.
- 520 Stovall, W. K., Ball, J. L., Westby, E. G., Poland, M. P., Wilkins, A., and Mulliken, K. M.: Officially social: Developing a  
social media crisis communication strategy for USGS Volcanoes during the 2018 Kīlauea eruption, *Front. Commun.*, 8,  
522 <https://doi.org/10.3389/fcomm.2023.976041>, 2023.
- Valdez, D., ten Thij, M., Bathina, K., Rutter, L. A., and Bollen, J.: Social media insights into US mental health during the  
524 COVID-19 pandemic: Longitudinal analysis of twitter data, *J. Med. Internet Res.*, 22, <https://doi.org/10.2196/21418>, 2020.
- Wadsworth, F. B., Llewellyn, E. W., Farquharson, J. I., Gillies, J. K., Loisel, A., Frey, L., Ilyinskaya, E., Thordarson, T.,



- 526 Tramontano, S., Lev, E., Pankhurst, M. J., Rull, A. G., Asensio-ramos, M., Pérez, N. M., Hernández, P. A., Calvo, D.,  
Solana, M. C., Kueppers, U., and Santabárbara, A. P.: Crowd-sourcing observations of volcanic eruptions during the 2021  
528 Fagradalsfjall and Cumbre Vieja events, *Nat. Commun.*, 13, <https://doi.org/10.1038/s41467-022-30333-4>, 2022.
- Williams, D. M., Avery, V. F., Coombs, M. L., Cox, D. A., Horwitz, L. R., McBride, S. K., McClymont, R. J., and Moran,  
530 S. C.: U.S. Geological Survey 2018 Kilauea Volcano Eruption Response in Hawai'i — After-Action Review, 2020.  
Williams, R. and Krippner, J.: The use of social media in volcano science communication: Challenges and opportunities,  
532 *Volcanica*, 1, I–VIII, <https://doi.org/10.30909/vol.01.02.i-viii>, 2019.
- Wu, D. and Cui, Y.: Disaster early warning and damage assessment analysis using social media data and geo-location  
534 information, *Decis. Support Syst.*, 111, 48–59, <https://doi.org/10.1016/j.dss.2018.04.005>, 2018.
- Young, J. C., Arthur, R., Spruce, M., and Williams, H. T. P.: Social sensing of heatwaves, *Sensors*, 21, 1–16,  
536 <https://doi.org/10.3390/s21113717>, 2021.
- Young, J. C., Arthur, R., Spruce, M., and Williams, H. T. P.: Social sensing of flood impacts in India: A case study of Kerala  
538 2018, *Int. J. Disaster Risk Reduct.*, 74, 102908, <https://doi.org/10.1016/j.ijdrr.2022.102908>, 2022.
- Yu, M., Yang, C., and Li, Y.: Big data in natural disaster management: A review, *Geosci.*, 8,  
540 <https://doi.org/10.3390/geosciences8050165>, 2018.
- Zhou, S., Kan, P., Huang, Q., and Silbernagel, J.: A guided latent Dirichlet allocation approach to investigate real-time latent  
542 topics of Twitter data during Hurricane Laura, *J. Inf. Sci.*, <https://doi.org/10.1177/01655515211007724>, 2021.
